# Supplementary material for: DRPPM-EASY: A Web-Based Framework for Integrative Analysis of Multi-Omics Cancer Datasets
Source: MDPI journal article supplement (doi:10.3390/biology11020260), 2022-02-08
Supplement: s1 [file s1]

Supplementary Figure S1.

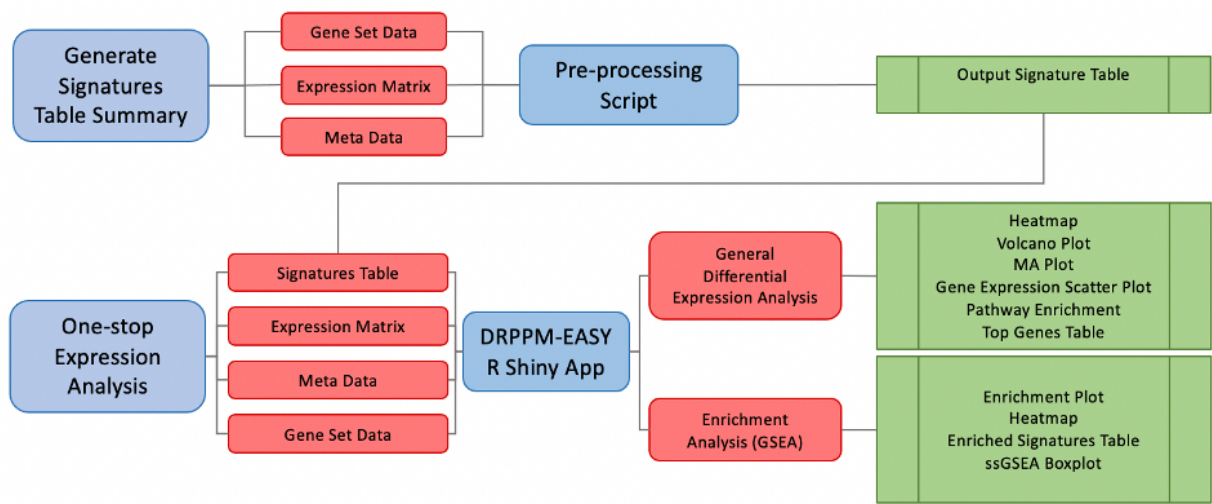

Supplementary Figure S1. Schematic of the GSEA pre-processing.

## Supplementary Figure S2.

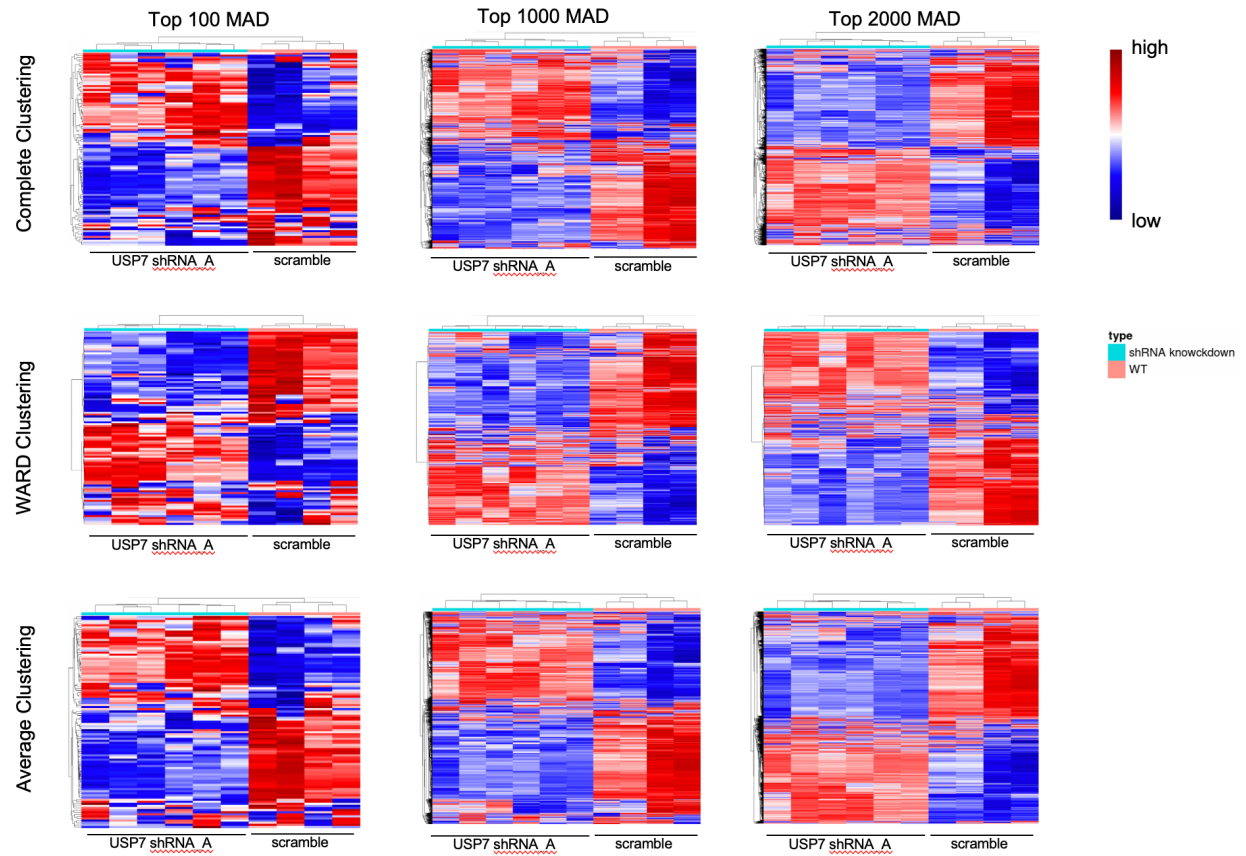

**Supplementary Figure S2.** Unsupervised hierarchical clustering of Jurkat samples after USP7 KD. Each row represents distinct clustering algorithms: Complete, WARD, and Average. Each column represents different number of variable genes selected by Mean Absolute Deviation (MAD).

Supplementary Figure S3.

A

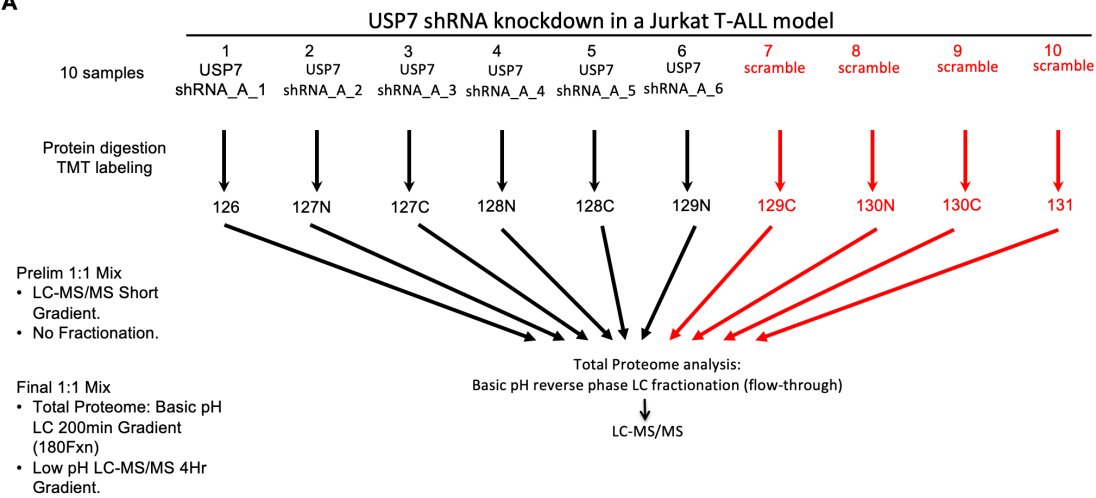

B

| GeneSets                            | Top Enriched Pathways |
|-------------------------------------|-----------------------|
| KEGG_SPLICEOSOME                    | 1                     |
| KEGG_RNA_POLYMERASE                 | 2                     |
| KEGG_PYRIMIDINE_METABOLISM          | 3                     |
| KEGG_LYSOSOME                       | 4                     |
| KEGG_HUNTINGTONS_DISEASE            | 5                     |
| KEGG_TGF_BETA_SIGNALING_PATHWAY     | 6                     |
| KEGG_PURINE_METABOLISM              | 7                     |
| KEGG_CELL_CYCLE                     | 8                     |
| KEGG_UBIQUITIN_MEDIATED_PROTEOLYSIS | 9                     |
| KEGG_P53_SIGNALING_PATHWAY          | 10                    |

C

| GeneSets                           | Top Enriched Pathways |
|------------------------------------|-----------------------|
| HALLMARK_UV_RESPONSE_UP            | 1                     |
| HALLMARK_INTERFERON_GAMMA_RESPONSE | 2                     |
| HALLMARK_G2M_CHECKPOINT            | 2                     |
| HALLMARK_UNFOLDED_PROTEIN_RESPONSE | 4                     |
| HALLMARK_MYC_TARGETS_V2            | 5                     |
| HALLMARK_ALLOGRAFT_REJECTION       | 6                     |
| HALLMARK_E2F_TARGETS               | 7                     |
| HALLMARK_MYC_TARGETS_V1            | 8                     |
| HALLMARK_ESTROGEN_RESPONSE_EARLY   | 9                     |
| HALLMARK_INTERFERON_ALPHA_RESPONSE | 10                    |

Supplementary Figure S3. A) Experimental design of the total proteome profiling of the USP7 knockdown experiment. B, C) Upregulated pathway ranked based on Jaccard index, Odds Ratio, and Cohen's Kappa in the KEGG database (B) and the HALLMARK database (C).

Supplementary Figure S4.

A

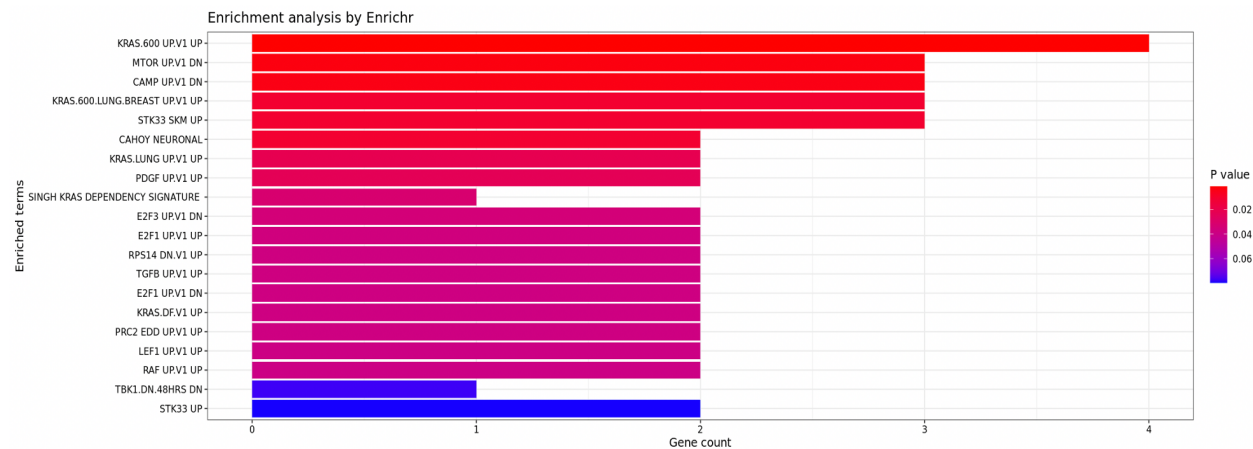

B

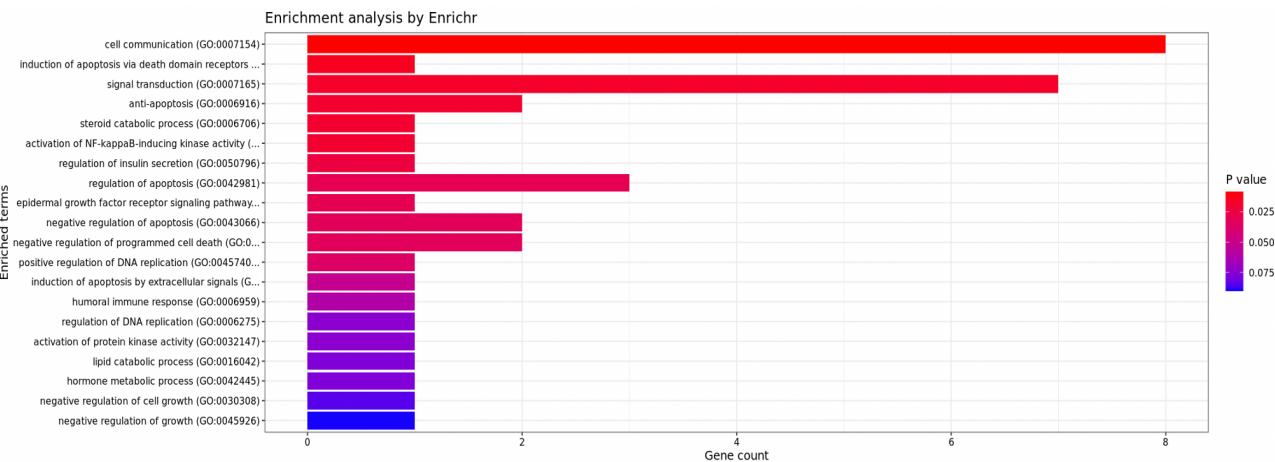

**Supplementary Figure S4.** Pathway enrichment analysis of genes differentially upregulated in KRAS mutated samples in NSCLC. A) Pathway analysis using the MsigDB Oncogenic Signature database. B) Pathway analysis using the GO Biological Process Gene Signatures.

## Supplementary Figure S5.

**A**

(CCLE Integrative Expression Analysis) Info and Methods **Data Input** Expression Scatter Plot Reciprocal GSEA Reciprocal ssGSEA Statistical Analysis

**Step1: User Data Input** **Step2: CCLE Data Selection** **Step3: Designate Comparison Groups**

**User Matrix Input**

Matrix Name:

User Matrix:

Expression Matrix File Upload

Browse...  [Upload Sample](#)

☒ Check if Header in Meta File

Meta Matrix File Upload

Browse...  [Upload Sample](#)

**User Expression Data**

Show  entries

| JK.S1.3.ERCC.S22 | JK.S1.3.ERCC.S23 | JK.S2.2.ERCC.S24 | JK.S3.3.ERCC.S25 | JK.A2.1.ERCC.S26 | JK.A2.2.ERCC.S27 | JK.A2.3.ERCC.S28 | JK.A2.4.ERCC.S29 | JK          |
|------------------|------------------|------------------|------------------|------------------|------------------|------------------|------------------|-------------|
| CALML5           | 5076.7808        | 5047.11731       | 28524.9838       | 50322.49028      | 8713.807758      | 14482.88278      | 16782.90874      | 15048.19104 |
| HBA1             | 21234.1036       | 117614.6915      | 49559.92989      | 211539.8332      | 77002.21583      | 198891.7212      | 5317.038757      | 10298.41757 |
| JAM3             | 123880.0834      | 111453.6285      | 76504.71477      | 75734.02977      | 35512.25008      | 32546.81754      | 33885.89157      | 31124.18232 |
| NRN1             | 57756.54448      | 52038.42882      | 50910.14739      | 41332.90797      | 20425.23618      | 17036.89156      | 21525.32589      | 18218.60237 |
| TNRC4            | 50063.21573      | 49132.24584      | 28237.31234      | 29388.43162      | 13552.58375      | 14156.82618      | 11451.78205      | 13537.26336 |
| DNFT             | 8691.73951       | 98034.14583      | 71179.70883      | 81605.28224      | 29734.78734      | 31629.58827      | 27818.04289      | 31759.89134 |
| SELBNP1          | 40335.60956      | 87433.90387      | 50172.68892      | 50117.38715      | 36117.80755      | 31126.38742      | 7331.125117      | 11011.28424 |

**B**

(CCLE Integrative Expression Analysis) Info and Methods **Data Input** Expression Scatter Plot Reciprocal GSEA Reciprocal ssGSEA Statistical Analysis

**Step1: User Data Input** **Step2: CCLE Data Selection** **Step3: Designate Comparison Groups**

**Subset Expression Data:**

Sample\_Changes:

Select Sample Subset:

Condition Selection:

☐ Log2 Transform Expression Data:

Label for Project Data:

CCLE

**Meta Data**

Show  entries

| SampleName          | Type   |
|---------------------|--------|
| ACH-000001.NKNCVARS | Female |
| ACH-000013.ONC0001  | Female |
| ACH-000048.TON110D  | Female |
| ACH-000091.ON06     | Female |
| ACH-000103.CADN4    | Female |
| ACH-000116.ON063    | Female |
| ACH-000125.COV43    | Female |
| ACH-000132.JH052    | Female |
| ACH-000137.JH047    | Female |
| ACH-000153.COV43    | Female |

**Expression Data**

Show  entries

| SampleName | ACH-000001.NKNCVARS | ACH-000013.ONC0001 | ACH |
|------------|---------------------|--------------------|-----|
| TNRC4      | 50.85               | 44.81              |     |
| TM6D3      | 0                   | 0.6                |     |
| SPN1       | 164.34              | 165.68             |     |
| SCYL3      | 3.29                | 2.75               |     |
| CTHPT2     | 17.86               | 15.9               |     |
| FGFR       | 0.03                | 0.02               |     |
| CHN        | 0.88                | 3.19               |     |
| FGFR2      | 62.02               | 41.87              |     |
| SCC2       | 28.87               | 17.41              |     |
| MPN1       | 10.10               | 10.35              |     |

**Name Map Guide**

Show  entries

| SampleName          | CCLE Name      |
|---------------------|----------------|
| ACH-000001.NKNCVARS | NKNCVARS_OVARY |
| ACH-000013.ONC0001  | ONC0001_OVARY  |
| ACH-000048.TON110D  | TON110D_OVARY  |
| ACH-000091.ON06     | ON06_OVARY     |
| ACH-000103.CADN4    | CADN4_OVARY    |
| ACH-000116.ON063    | ON063_OVARY    |
| ACH-000125.COV43    | COV43_OVARY    |
| ACH-000132.JH052    | JH052_OVARY    |
| ACH-000137.JH047    | JH047_OVARY    |
| ACH-000153.COV43    | COV43_OVARY    |

**C**

**Comparison Groups From User Data:**

Comparison Group 1:

Comparison Group 2:

**Comparison Groups From CCLE Data:**

Comparison Group 1:

Comparison Group 2:

Label Group 1 and Group 2:

Group 1 Label:

Group 2 Label:

Download Compiled Meta Table:

File Name for Download:

[Download](#)

**Step1: User Data Input** **Step2: CCLE Data Selection** **Step3: Designate Comparison Groups**

Show  entries

| SampleName          | Type           |
|---------------------|----------------|
| JK.A2.1.ERCC.S26    | USP7KO_HLWEmut |
| JK.A2.2.ERCC.S27    | USP7KO_HLWEmut |
| JK.A2.3.ERCC.S28    | USP7KO_HLWEmut |
| JK.A2.4.ERCC.S29    | USP7KO_HLWEmut |
| JK.A2.5.ERCC.S30    | USP7KO_HLWEmut |
| JK.A2.6.ERCC.S31    | USP7KO_HLWEmut |
| ACH-000062.DC314    | USP7KO_HLWEmut |
| ACH-001145.DC316    | USP7KO_HLWEmut |
| JK.S1.2.ERCC.S22    | USP7wt         |
| JK.S1.3.ERCC.S23    | USP7wt         |
| JK.S2.2.ERCC.S24    | USP7wt         |
| JK.S2.3.ERCC.S25    | USP7wt         |
| ACH-000001.NKNCVARS | USP7wt         |
| ACH-000013.ONC0001  | USP7wt         |
| ACH-000048.TON110D  | USP7wt         |
| ACH-000091.ON06     | USP7wt         |
| ACH-000103.CADN4    | USP7wt         |
| ACH-000132.JH052    | USP7wt         |

**Supplementary Figure S5.** Screen shot showing the user option to upload user data in the DRPPM-Large Project Integration function. (CCLE example). **A)** Step 1. The user can upload a matrix and its associated sample meta-information file. **B)** Step 2. The user will select the CCLE sample cohort to analyze and select the phenotype for the group comparison. **C)** Step3. Harmonizes the sample grouping between the two datasets.
